# Supplementary material for: Analysis of the ν3 + ν7 combination band of CF2Cl2 from spectra obtained by high resolution diode laser and FTIR supersonic jet techniquesElectronic supplementary information (ESI) available: line assignments for diode laser spectra for transitions ν3 and ν7 of CF235Cl2 (Table S1) and CF235Cl37Cl (Table S2). See http://www.rsc.org/suppdata/cp/b1/b110919g/
Source: Royal Society of Chemistry journal article supplement (doi:10.1039/b110919g), 2002-03-25
Supplement: tables.pdf [file tables.pdf]

Table S1: Transitions of  $\nu_3+\nu_7$  of  $\text{CF}_2^{35}\text{Cl}_2$  (in  $\text{cm}^{-1}$ )  
Line assignments for diode laser spectra.

| $J' K'_a K'_c$ | $J K_a K_c$ | $\tilde{\nu}_0^{\text{exp}}$ | $\Delta$ | $J' K'_a K'_c$ | $J K_a K_c$ | $\tilde{\nu}_0^{\text{exp}}$ | $\Delta$ | $J' K'_a K'_c$ | $J K_a K_c$ | $\tilde{\nu}_0^{\text{exp}}$ | $\Delta$ |
|----------------|-------------|------------------------------|----------|----------------|-------------|------------------------------|----------|----------------|-------------|------------------------------|----------|
| 15 4 11        | 16 4 12     | 885.7027                     | -1       | 14 11 3        | 15 11 4     | 886.1788                     | 19       | 6 2 4          | 5 2 3       | 889.4916                     | -5       |
| 16 9 8         | 17 9 9      | 885.7264                     | 6        | 14 11 4        | 15 11 5     | 886.1788                     | 19       | 6 5 2          | 5 5 1       | 889.5072                     | 0        |
| 16 9 7         | 17 9 8      | 885.7264                     | 7        | 13 7 6         | 14 7 7      | 886.1975                     | 5        | 6 5 1          | 5 5 0       | 889.5072                     | 0        |
| 15 6 9         | 16 6 10     | 885.7555                     | 5        | 13 7 7         | 14 7 8      | 886.1975                     | -6       | 7 0 7          | 6 0 6       | 889.5635                     | 0        |
| 16 2 14        | 17 2 15     | 885.7611                     | 1        | 13 2 11        | 14 2 12     | 886.2137                     | 7        | 7 1 7          | 6 1 6       | 889.5635                     | 15       |
| 17 1 17        | 18 1 18     | 885.7611                     | 0        | 14 0 14        | 15 0 15     | 886.2158                     | 12       | 7 2 6          | 6 2 5       | 889.6059                     | -1       |
| 17 0 17        | 18 0 18     | 885.7611                     | 0        | 14 1 14        | 15 1 15     | 886.2158                     | 12       | 7 1 6          | 6 1 5       | 889.6190                     | -5       |
| 15 6 10        | 16 6 11     | 885.7983                     | -4       | 13 3 11        | 14 3 12     | 886.2241                     | 7        | 7 3 5          | 6 3 4       | 889.6338                     | -1       |
| 15 3 12        | 16 3 13     | 885.8156                     | -1       | 12 4 8         | 13 4 9      | 886.2269                     | 6        | 7 4 4          | 6 4 3       | 889.6496                     | -1       |
| 15 7 8         | 16 7 9      | 885.8225                     | -5       | 13 8 6         | 14 8 7      | 886.2347                     | 1        | 7 4 3          | 6 4 2       | 889.6518                     | 2        |
| 16 2 15        | 17 2 16     | 885.8384                     | -2       | 13 8 5         | 14 8 6      | 886.2347                     | 2        | 7 2 5          | 6 2 4       | 889.6518                     | -7       |
| 16 1 15        | 17 1 16     | 885.8384                     | -1       | 12 3 9         | 13 3 10     | 886.2604                     | 6        | 7 3 4          | 6 3 3       | 889.6518                     | 5        |
| 15 4 12        | 16 4 13     | 885.8449                     | -1       | 13 9 4         | 14 9 5      | 886.2714                     | -11      | 7 5 3          | 6 5 2       | 889.6641                     | -13      |
| 14 4 10        | 15 4 11     | 885.8672                     | 0        | 13 9 5         | 14 9 6      | 886.2714                     | -11      | 7 5 2          | 6 5 1       | 889.6641                     | -13      |
| 14 5 9         | 15 5 10     | 885.8790                     | 0        | 12 5 7         | 13 5 8      | 886.2842                     | 5        | 7 6 2          | 6 6 1       | 889.6854                     | 1        |
| 15 9 6         | 16 9 7      | 885.9103                     | 4        | 13 2 12        | 14 2 13     | 886.2948                     | 4        | 7 6 1          | 6 6 0       | 889.6854                     | 1        |
| 15 9 7         | 16 9 8      | 885.9103                     | 4        | 13 1 12        | 14 1 13     | 886.2948                     | 11       | 8 0 8          | 7 0 7       | 889.7106                     | -2       |
| 16 1 16        | 17 1 17     | 885.9128                     | 4        | 13 10 3        | 14 10 4     | 886.3119                     | -8       | 8 1 8          | 7 1 7       | 889.7106                     | 5        |
| 15 2 13        | 16 2 14     | 885.9128                     | 1        | 13 10 4        | 14 10 5     | 886.3119                     | -8       | 8 2 7          | 7 2 6       | 889.7561                     | 0        |
| 16 0 16        | 17 0 17     | 885.9128                     | 4        | 12 5 8         | 13 5 9      | 886.3237                     | 3        | 8 1 7          | 7 1 6       | 889.7656                     | 0        |
| 15 3 13        | 16 3 14     | 885.9158                     | 0        | 12 4 9         | 13 4 10     | 886.3318                     | 6        | 8 3 6          | 7 3 5       | 889.7884                     | -3       |
| 14 6 8         | 15 6 9      | 885.9571                     | -3       | 12 6 6         | 13 6 7      | 886.3417                     | 6        | 8 2 6          | 7 2 5       | 889.8077                     | -10      |
| 14 3 11        | 15 3 12     | 885.9608                     | -2       | 12 6 7         | 13 6 8      | 886.3471                     | 5        | 8 4 5          | 7 4 4       | 889.8077                     | 3        |
| 14 5 10        | 15 5 11     | 885.9717                     | -1       | 12 2 10        | 13 2 11     | 886.3617                     | 7        | 8 4 4          | 7 4 3       | 889.8116                     | -2       |
| 14 6 9         | 15 6 10     | 885.9811                     | -4       | 13 1 13        | 14 1 14     | 886.3668                     | 12       | 8 3 5          | 7 3 4       | 889.8157                     | 0        |
| 15 2 14        | 16 2 15     | 885.9906                     | 0        | 13 0 13        | 14 0 14     | 886.3668                     | 12       | 8 5 3          | 7 5 2       | 889.8229                     | -4       |
| 15 1 14        | 16 1 15     | 885.9906                     | 2        | 12 7 5         | 13 7 6      | 886.3796                     | 4        | 8 5 4          | 7 5 3       | 889.8229                     | -1       |
| 14 4 11        | 15 4 12     | 886.0044                     | -1       | 12 3 10        | 13 3 11     | 886.3796                     | 11       | 8 6 2          | 7 6 1       | 889.8426                     | 2        |
| 14 7 7         | 15 7 8      | 886.0113                     | -6       | 12 7 6         | 13 7 7      | 886.3796                     | 1        | 8 6 3          | 7 6 2       | 889.8426                     | 2        |
| 14 7 8         | 15 7 9      | 886.0141                     | -5       | 12 8 4         | 13 8 5      | 886.4149                     | 5        | 9 0 9          | 8 0 8       | 889.8583                     | 1        |
| 13 4 9         | 14 4 10     | 886.0423                     | 1        | 12 8 5         | 13 8 6      | 886.4149                     | 5        | 9 1 9          | 8 1 8       | 889.8583                     | 4        |
| 14 8 7         | 15 8 8      | 886.0520                     | -8       | 11 4 7         | 12 4 8      | 886.4182                     | 8        | 8 7 2          | 7 7 1       | 889.8662                     | -3       |
| 14 8 6         | 15 8 7      | 886.0520                     | -6       | 11 3 8         | 12 3 9      | 886.4207                     | 7        | 8 7 1          | 7 7 0       | 889.8662                     | -3       |
| 15 1 15        | 16 1 16     | 886.0639                     | 4        | 5 2 4          | 4 2 3       | 889.2997                     | -8       | 9 2 8          | 8 2 7       | 889.9050                     | 1        |
| 14 2 12        | 15 2 13     | 886.0639                     | 5        | 5 1 4          | 4 1 3       | 889.3165                     | -7       | 9 1 8          | 8 1 7       | 889.9107                     | 1        |
| 15 0 15        | 16 0 16     | 886.0639                     | 4        | 5 3 3          | 4 3 2       | 889.3184                     | -5       | 9 3 7          | 8 3 6       | 889.9416                     | 0        |
| 14 3 12        | 15 3 13     | 886.0695                     | 2        | 5 3 2          | 4 3 1       | 889.3223                     | -6       | 9 2 7          | 8 2 6       | 889.9604                     | -2       |
| 13 5 8         | 14 5 9      | 886.0822                     | 0        | 5 2 3          | 4 2 2       | 889.3275                     | -6       | 9 4 6          | 8 4 5       | 889.9637                     | -1       |
| 14 9 6         | 15 9 7      | 886.0911                     | -10      | 5 4 1          | 4 4 0       | 889.3314                     | -7       | 9 4 5          | 8 4 4       | 889.9727                     | -2       |
| 14 9 5         | 15 9 6      | 886.0911                     | -10      | 5 4 2          | 4 4 1       | 889.3314                     | -6       | 9 3 6          | 8 3 5       | 889.9779                     | 0        |
| 14 10 5        | 15 10 6     | 886.1345                     | 13       | 6 1 6          | 5 1 5       | 889.4133                     | -1       | 9 5 4          | 8 5 3       | 889.9806                     | -2       |
| 14 10 4        | 15 10 5     | 886.1345                     | 13       | 6 0 6          | 5 0 5       | 889.4164                     | -1       | 9 5 5          | 8 5 4       | 889.9806                     | 6        |
| 14 2 13        | 15 2 14     | 886.1430                     | 5        | 6 2 5          | 5 2 4       | 889.4540                     | -2       | 9 6 3          | 8 6 2       | 889.9989                     | -1       |
| 14 1 13        | 15 1 14     | 886.1430                     | 8        | 6 1 5          | 5 1 4       | 889.4701                     | -3       | 9 6 4          | 8 6 3       | 889.9989                     | 0        |
| 13 5 9         | 14 5 10     | 886.1468                     | 2        | 6 3 4          | 5 3 3       | 889.4770                     | -2       | 10 1 10        | 9 1 9       | 890.0059                     | 5        |
| 13 6 7         | 14 6 8      | 886.1525                     | 1        | 6 3 3          | 5 3 2       | 889.4863                     | -2       | 10 0 10        | 9 0 9       | 890.0059                     | 4        |
| 13 6 8         | 14 6 9      | 886.1646                     | 1        | 6 4 3          | 5 4 2       | 889.4916                     | 4        | 9 7 2          | 8 7 1       | 890.0227                     | 2        |
| 13 4 10        | 14 4 11     | 886.1666                     | 2        | 6 4 2          | 5 4 1       | 889.4916                     | -2       | 9 7 3          | 8 7 2       | 890.0227                     | 2        |

$\Delta = \text{o-c}$  (observed minus calculated) in  $10^{-4} \text{ cm}^{-1}$

Table S1: Continued ( 1): Transitions of  $\nu_3+\nu_7$  of  $\text{CF}_2^{35}\text{Cl}_2$  (in  $\text{cm}^{-1}$ )

## Assignments of FTIR spectra.

| $J' K'_a K'_c$ | $J K_a K_c$ | $\tilde{\nu}_0^{\text{exp}}$ | $\Delta$ | $J' K'_a K'_c$ | $J K_a K_c$ | $\tilde{\nu}_0^{\text{exp}}$ | $\Delta$ | $J' K'_a K'_c$ | $J K_a K_c$ | $\tilde{\nu}_0^{\text{exp}}$ | $\Delta$ |
|----------------|-------------|------------------------------|----------|----------------|-------------|------------------------------|----------|----------------|-------------|------------------------------|----------|
| 37 3 34        | 38 3 35     | 882.4264                     | -12      | 28 4 25        | 29 4 26     | 883.8314                     | 2        | 21 2 19        | 22 2 20     | 884.9962                     | -5       |
| 37 4 34        | 38 4 35     | 882.4264                     | -12      | 28 3 25        | 29 3 26     | 883.8314                     | 2        | 21 3 19        | 22 3 20     | 884.9962                     | -5       |
| 38 2 37        | 39 2 38     | 882.4631                     | 0        | 29 2 28        | 30 2 29     | 883.8508                     | -5       | 22 0 22        | 23 0 23     | 885.0037                     | 8        |
| 38 1 37        | 39 1 38     | 882.4631                     | 0        | 29 1 28        | 30 1 29     | 883.8508                     | -5       | 22 1 22        | 23 1 23     | 885.0037                     | 8        |
| 36 4 33        | 37 4 34     | 882.5853                     | 11       | 28 3 26        | 29 3 27     | 883.9181                     | -10      | 21 1 20        | 22 1 21     | 885.0756                     | -11      |
| 36 3 33        | 37 3 34     | 882.5853                     | 11       | 28 2 26        | 29 2 27     | 883.9181                     | -10      | 21 2 20        | 22 2 21     | 885.0756                     | -11      |
| 37 1 36        | 38 1 37     | 882.6168                     | -11      | 29 1 29        | 30 1 30     | 883.9389                     | 22       | 21 1 21        | 22 1 22     | 885.1571                     | 23       |
| 37 2 36        | 38 2 37     | 882.6168                     | -11      | 29 0 29        | 30 0 30     | 883.9389                     | 22       | 21 0 21        | 22 0 22     | 885.1571                     | 23       |
| 37 1 37        | 38 1 38     | 882.7112                     | 0        | 27 4 24        | 28 4 25     | 883.9869                     | 6        | 20 1 19        | 21 1 20     | 885.2280                     | -13      |
| 37 0 37        | 38 0 38     | 882.7112                     | 0        | 27 3 24        | 28 3 25     | 883.9869                     | 6        | 20 2 19        | 21 2 20     | 885.2280                     | -13      |
| 35 3 32        | 36 3 33     | 882.7419                     | 13       | 28 1 27        | 29 1 28     | 884.0048                     | -2       | 20 0 20        | 21 0 21     | 885.3051                     | -14      |
| 35 4 32        | 36 4 33     | 882.7419                     | 13       | 28 2 27        | 29 2 28     | 884.0048                     | -2       | 20 1 20        | 21 1 21     | 885.3051                     | -14      |
| 36 1 36        | 37 1 37     | 882.8662                     | 14       | 27 3 25        | 28 3 26     | 884.0727                     | -8       | 19 1 18        | 20 1 19     | 885.3807                     | -11      |
| 36 0 36        | 37 0 37     | 882.8662                     | 14       | 27 2 25        | 28 2 26     | 884.0727                     | -8       | 19 2 18        | 20 2 19     | 885.3807                     | -11      |
| 35 1 34        | 36 1 35     | 882.9254                     | -16      | 28 1 28        | 29 1 29     | 884.0887                     | -6       | 19 1 19        | 20 1 20     | 885.4568                     | -14      |
| 35 2 34        | 36 2 35     | 882.9254                     | -16      | 28 0 28        | 29 0 29     | 884.0887                     | -6       | 19 0 19        | 20 0 20     | 885.4568                     | -14      |
| 34 2 32        | 35 2 33     | 882.9887                     | -13      | 26 3 23        | 27 3 24     | 884.1411                     | -2       | 18 2 17        | 19 2 18     | 885.5335                     | -7       |
| 34 3 32        | 35 3 33     | 882.9887                     | -13      | 26 4 23        | 27 4 24     | 884.1411                     | -2       | 18 1 17        | 19 1 18     | 885.5335                     | -7       |
| 33 4 30        | 34 4 31     | 883.0528                     | -2       | 27 2 26        | 28 2 27     | 884.1588                     | 4        | 18 0 18        | 19 0 19     | 885.6092                     | -4       |
| 33 3 30        | 34 3 31     | 883.0528                     | -2       | 27 1 26        | 28 1 27     | 884.1588                     | 4        | 18 1 18        | 19 1 19     | 885.6092                     | -4       |
| 34 2 33        | 35 2 34     | 883.0798                     | -16      | 26 3 24        | 27 3 25     | 884.2276                     | -1       | 17 1 16        | 18 1 17     | 885.6862                     | -2       |
| 34 1 33        | 35 1 34     | 883.0798                     | -16      | 26 2 24        | 27 2 25     | 884.2276                     | -1       | 17 2 16        | 18 2 17     | 885.6862                     | -2       |
| 34 0 34        | 35 0 35     | 883.1721                     | 4        | 27 0 27        | 28 0 28     | 884.2423                     | 3        | 17 1 17        | 18 1 18     | 885.7610                     | 0        |
| 34 1 34        | 35 1 35     | 883.1721                     | 4        | 27 1 27        | 28 1 28     | 884.2423                     | 3        | 17 0 17        | 18 0 18     | 885.7610                     | 0        |
| 31 4 27        | 32 4 28     | 883.2736                     | 20       | 26 1 25        | 27 1 26     | 884.3114                     | -4       | 16 0 16        | 17 0 17     | 885.9121                     | -3       |
| 31 5 27        | 32 5 28     | 883.2736                     | 20       | 26 2 25        | 27 2 26     | 884.3114                     | -4       | 16 1 16        | 17 1 17     | 885.9121                     | -3       |
| 32 3 30        | 33 3 31     | 883.2979                     | -23      | 25 3 23        | 26 3 24     | 884.3806                     | -12      | 15 0 15        | 16 0 16     | 886.0634                     | -1       |
| 32 2 30        | 33 2 31     | 883.2979                     | -23      | 25 2 23        | 26 2 24     | 884.3806                     | -12      | 15 1 15        | 16 1 16     | 886.0634                     | -1       |
| 33 0 33        | 34 0 34     | 883.3241                     | -7       | 26 0 26        | 27 0 27     | 884.3936                     | -7       | 14 0 14        | 15 0 15     | 886.2135                     | -11      |
| 33 1 33        | 34 1 34     | 883.3241                     | -7       | 26 1 26        | 27 1 27     | 884.3936                     | -7       | 14 1 14        | 15 1 15     | 886.2135                     | -11      |
| 31 3 28        | 32 3 29     | 883.3636                     | -12      | 25 2 24        | 26 2 25     | 884.4651                     | 1        | 14 0 14        | 13 0 13     | 890.5950                     | 7        |
| 31 4 28        | 32 4 29     | 883.3636                     | -12      | 25 1 24        | 26 1 25     | 884.4651                     | 1        | 14 1 14        | 13 1 13     | 890.5950                     | 7        |
| 31 3 29        | 32 3 30     | 883.4526                     | -25      | 24 2 22        | 25 2 23     | 884.5365                     | 8        | 15 0 15        | 14 0 14     | 890.7407                     | -4       |
| 31 2 29        | 32 2 30     | 883.4526                     | -25      | 24 3 22        | 25 3 23     | 884.5365                     | 8        | 15 1 15        | 14 1 14     | 890.7407                     | -4       |
| 32 1 32        | 33 1 33     | 883.4792                     | 12       | 25 0 25        | 26 0 26     | 884.5473                     | 6        | 16 0 16        | 15 0 15     | 890.8879                     | 0        |
| 32 0 32        | 33 0 33     | 883.4792                     | 12       | 25 1 25        | 26 1 26     | 884.5473                     | 6        | 16 1 16        | 15 1 15     | 890.8879                     | 0        |
| 30 4 27        | 31 4 28     | 883.5198                     | -6       | 24 2 23        | 25 2 24     | 884.6175                     | -6       | 17 0 17        | 16 0 16     | 891.0338                     | -9       |
| 30 3 27        | 31 3 28     | 883.5198                     | -6       | 24 1 23        | 25 1 24     | 884.6175                     | -6       | 17 1 17        | 16 1 16     | 891.0338                     | -9       |
| 31 1 30        | 32 1 31     | 883.5427                     | -11      | 23 3 21        | 24 3 22     | 884.6889                     | -6       | 17 2 16        | 16 2 15     | 891.0773                     | 4        |
| 31 2 30        | 32 2 31     | 883.5427                     | -11      | 23 2 21        | 24 2 22     | 884.6889                     | -6       | 17 1 16        | 16 1 15     | 891.0773                     | 4        |
| 29 5 25        | 30 5 26     | 883.5863                     | 22       | 24 0 24        | 25 0 25     | 884.6994                     | 5        | 18 1 18        | 17 1 17     | 891.1813                     | 1        |
| 29 4 25        | 30 4 26     | 883.5863                     | 23       | 24 1 24        | 25 1 25     | 884.6994                     | 5        | 18 0 18        | 17 0 17     | 891.1813                     | 1        |
| 30 2 28        | 31 2 29     | 883.6094                     | -6       | 23 1 22        | 24 1 23     | 884.7708                     | -3       | 18 1 17        | 17 1 16     | 891.2206                     | -20      |
| 30 3 28        | 31 3 29     | 883.6094                     | -6       | 23 2 22        | 24 2 23     | 884.7708                     | -3       | 18 2 17        | 17 2 16     | 891.2206                     | -20      |
| 31 1 31        | 32 1 32     | 883.6315                     | 5        | 22 2 20        | 23 2 21     | 884.8427                     | -5       | 19 0 19        | 18 0 18     | 891.3281                     | 5        |
| 31 0 31        | 32 0 32     | 883.6315                     | 5        | 22 3 20        | 23 3 21     | 884.8427                     | -5       | 19 1 19        | 18 1 18     | 891.3281                     | 5        |
| 30 1 29        | 31 1 30     | 883.6981                     | 5        | 23 0 23        | 24 0 24     | 884.8509                     | 0        | 19 1 18        | 18 1 17     | 891.3673                     | -8       |
| 30 2 29        | 31 2 30     | 883.6981                     | 5        | 23 1 23        | 24 1 24     | 884.8509                     | 0        | 19 2 18        | 18 2 17     | 891.3673                     | -8       |
| 30 1 30        | 31 1 31     | 883.7843                     | 4        | 22 1 21        | 23 1 22     | 884.9230                     | -9       | 20 1 20        | 19 1 19     | 891.4752                     | 12       |
| 30 0 30        | 31 0 31     | 883.7843                     | 4        | 22 2 21        | 23 2 22     | 884.9230                     | -9       | 20 0 20        | 19 0 19     | 891.4752                     | 12       |

 $\Delta = \text{o-c}$  (observed minus calculated) in  $10^{-4} \text{ cm}^{-1}$

Table S1: Continued ( 2): Transitions of  $\nu_3+\nu_7$  of  $\text{CF}_2^{35}\text{Cl}_2$  (in  $\text{cm}^{-1}$ )

## Assignments of FTIR spectra.

| $J' K'_a K'_c$ | $J K_a K_c$ | $\tilde{\nu}_0^{\text{exp}}$ | $\Delta$ | $J' K'_a K'_c$ | $J K_a K_c$ | $\tilde{\nu}_0^{\text{exp}}$ | $\Delta$ | $J' K'_a K'_c$ | $J K_a K_c$ | $\tilde{\nu}_0^{\text{exp}}$ | $\Delta$ |
|----------------|-------------|------------------------------|----------|----------------|-------------|------------------------------|----------|----------------|-------------|------------------------------|----------|
| 20 1 19        | 19 1 18     | 891.5133                     | -2       | 27 1 27        | 26 1 26     | 892.4950                     | 3        | 31 2 29        | 30 2 28     | 893.1322                     | -7       |
| 20 2 19        | 19 2 18     | 891.5133                     | -2       | 27 0 27        | 26 0 26     | 892.4950                     | 3        | 31 3 29        | 30 3 28     | 893.1322                     | -7       |
| 21 1 20        | 20 1 19     | 891.6595                     | 7        | 27 1 26        | 26 1 25     | 892.5271                     | -8       | 31 4 28        | 30 4 27     | 893.1594                     | -4       |
| 21 2 20        | 20 2 19     | 891.6595                     | 7        | 27 2 26        | 26 2 25     | 892.5271                     | -8       | 31 3 28        | 30 3 27     | 893.1594                     | -4       |
| 21 2 19        | 20 2 18     | 891.6956                     | -8       | 27 2 25        | 26 2 24     | 892.5600                     | 0        | 31 5 27        | 30 5 26     | 893.1866                     | 13       |
| 21 3 19        | 20 3 18     | 891.6956                     | -8       | 27 3 25        | 26 3 24     | 892.5600                     | 0        | 31 4 27        | 30 4 26     | 893.1866                     | 13       |
| 22 0 22        | 21 0 21     | 891.7675                     | 13       | 27 4 24        | 26 4 23     | 892.5920                     | 13       | 32 1 31        | 31 1 30     | 893.2484                     | -1       |
| 22 1 22        | 21 1 21     | 891.7675                     | 13       | 27 3 24        | 26 3 23     | 892.5920                     | 13       | 32 2 31        | 31 2 30     | 893.2484                     | -1       |
| 22 2 21        | 21 2 20     | 891.8033                     | -7       | 28 1 28        | 27 1 27     | 892.6401                     | 0        | 32 2 30        | 31 2 29     | 893.2753                     | -4       |
| 22 1 21        | 21 1 20     | 891.8033                     | -7       | 28 0 28        | 27 0 27     | 892.6401                     | 0        | 32 3 30        | 31 3 29     | 893.2753                     | -4       |
| 22 2 20        | 21 2 19     | 891.8403                     | -3       | 28 1 27        | 27 1 26     | 892.6732                     | 10       | 32 4 29        | 31 4 28     | 893.3032                     | 14       |
| 22 3 20        | 21 3 19     | 891.8403                     | -3       | 28 2 27        | 27 2 26     | 892.6732                     | 10       | 32 3 29        | 31 3 28     | 893.3032                     | 14       |
| 23 0 23        | 22 0 22     | 891.9124                     | 2        | 28 3 26        | 27 3 25     | 892.7026                     | -7       | 33 0 33        | 32 0 32     | 893.3644                     | -5       |
| 23 1 23        | 22 1 22     | 891.9124                     | 2        | 28 2 26        | 27 2 25     | 892.7026                     | -7       | 33 1 33        | 32 1 32     | 893.3644                     | -5       |
| 23 3 21        | 22 3 20     | 891.9841                     | -7       | 28 3 25        | 27 3 24     | 892.7338                     | 6        | 33 3 30        | 32 3 29     | 893.4437                     | 2        |
| 23 2 21        | 22 2 20     | 891.9841                     | -7       | 28 4 25        | 27 4 24     | 892.7338                     | 6        | 33 4 30        | 32 4 29     | 893.4437                     | 2        |
| 24 1 24        | 23 1 23     | 892.0586                     | 6        | 29 1 28        | 28 1 27     | 892.8161                     | -4       | 34 1 34        | 33 1 33     | 893.5102                     | 7        |
| 24 0 24        | 23 0 23     | 892.0586                     | 6        | 29 2 28        | 28 2 27     | 892.8161                     | -4       | 34 0 34        | 33 0 33     | 893.5102                     | 7        |
| 24 2 23        | 23 2 22     | 892.0941                     | 2        | 29 3 27        | 28 3 26     | 892.8450                     | -17      | 34 2 33        | 33 2 32     | 893.5362                     | 6        |
| 24 1 23        | 23 1 22     | 892.0941                     | 2        | 29 2 27        | 28 2 26     | 892.8450                     | -17      | 34 1 33        | 33 1 32     | 893.5362                     | 6        |
| 24 3 22        | 23 3 21     | 892.1288                     | 0        | 29 3 26        | 28 3 25     | 892.8734                     | -22      | 34 3 32        | 33 3 31     | 893.5613                     | 3        |
| 24 2 22        | 23 2 21     | 892.1288                     | 0        | 29 4 26        | 28 4 25     | 892.8734                     | -22      | 34 2 32        | 33 2 31     | 893.5613                     | 3        |
| 25 1 25        | 24 1 24     | 892.2035                     | -2       | 29 5 25        | 28 5 24     | 892.9036                     | 8        | 35 0 35        | 34 0 34     | 893.6558                     | 19       |
| 25 0 25        | 24 0 24     | 892.2035                     | -2       | 29 4 25        | 28 4 24     | 892.9036                     | 8        | 35 1 35        | 34 1 34     | 893.6558                     | 19       |
| 25 2 24        | 24 2 23     | 892.2382                     | -5       | 30 1 30        | 29 1 29     | 892.9311                     | 7        | 35 2 34        | 34 2 33     | 893.6775                     | -16      |
| 25 1 24        | 24 1 23     | 892.2382                     | -5       | 30 0 30        | 29 0 29     | 892.9311                     | 7        | 35 1 34        | 34 1 33     | 893.6775                     | -16      |
| 25 3 23        | 24 3 22     | 892.2727                     | 1        | 30 2 29        | 29 2 28     | 892.9588                     | -19      | 35 3 32        | 34 3 31     | 893.7281                     | 16       |
| 25 2 23        | 24 2 22     | 892.2727                     | 1        | 30 1 29        | 29 1 28     | 892.9588                     | -19      | 35 4 32        | 34 4 31     | 893.7281                     | 16       |
| 26 1 26        | 25 1 25     | 892.3494                     | 1        | 30 3 28        | 29 3 27     | 892.9888                     | -10      | 36 4 33        | 35 4 32     | 893.8692                     | 14       |
| 26 0 26        | 25 0 25     | 892.3494                     | 1        | 30 2 28        | 29 2 27     | 892.9888                     | -10      | 36 3 33        | 35 3 32     | 893.8692                     | 14       |
| 26 2 25        | 25 2 24     | 892.3822                     | -12      | 30 3 27        | 29 3 26     | 893.0181                     | 3        | 37 0 37        | 36 0 36     | 893.9431                     | 7        |
| 26 1 25        | 25 1 24     | 892.3822                     | -12      | 30 4 27        | 29 4 26     | 893.0181                     | 3        | 37 1 37        | 36 1 36     | 893.9431                     | 7        |
| 26 2 24        | 25 2 23     | 892.4153                     | -10      | 31 0 31        | 30 0 30     | 893.0749                     | -5       | 37 3 34        | 36 3 33     | 894.0077                     | -11      |
| 26 3 24        | 25 3 23     | 892.4153                     | -10      | 31 1 31        | 30 1 30     | 893.0749                     | -5       | 37 4 34        | 36 4 33     | 894.0077                     | -11      |
| 26 3 23        | 25 3 22     | 892.4482                     | 2        | 31 1 30        | 30 1 29     | 893.1025                     | -20      | 38 1 37        | 37 1 36     | 894.1090                     | 5        |
| 26 4 23        | 25 4 22     | 892.4482                     | 2        | 31 2 30        | 30 2 29     | 893.1025                     | -20      | 38 2 37        | 37 2 36     | 894.1090                     | 5        |

 $\Delta = \text{o-c}$  (observed minus calculated) in  $10^{-4} \text{ cm}^{-1}$

Table S2: Transitions of  $\nu_3+\nu_7$  of  $\text{CF}_2^{35}\text{Cl}^{37}\text{Cl}$  (in  $\text{cm}^{-1}$ )

Line assignments of diode laser spectra.

| $J' K'_a K'_c$ | $J K_a K_c$ | $\tilde{\nu}_0^{\text{exp}}$ | $\Delta$ | $J' K'_a K'_c$ | $J K_a K_c$ | $\tilde{\nu}_0^{\text{exp}}$ | $\Delta$ | $J' K'_a K'_c$ | $J K_a K_c$ | $\tilde{\nu}_0^{\text{exp}}$ | $\Delta$ |
|----------------|-------------|------------------------------|----------|----------------|-------------|------------------------------|----------|----------------|-------------|------------------------------|----------|
| 7 2 5          | 8 2 6       | 881.8662                     | -10      | 6 5 1          | 7 5 2       | 882.1129                     | -1       | 4 4 0          | 5 4 1       | 882.4269                     | 11       |
| 7 3 4          | 8 3 5       | 881.8764                     | -7       | 6 6 0          | 7 6 1       | 882.1357                     | 2        | 4 0 4          | 5 0 5       | 882.4391                     | 5        |
| 7 4 3          | 8 4 4       | 881.9182                     | -4       | 6 6 1          | 7 6 2       | 882.1357                     | 2        | 4 1 4          | 5 1 5       | 882.4486                     | 4        |
| 7 3 5          | 8 3 6       | 881.9208                     | -8       | 6 0 6          | 7 0 7       | 882.1480                     | -4       | 17 1 16        | 16 1 15     | 885.7392                     | 0        |
| 7 4 4          | 8 4 5       | 881.9258                     | -1       | 6 1 6          | 7 1 7       | 882.1512                     | -5       | 17 2 16        | 16 2 15     | 885.7392                     | 0        |
| 7 5 2          | 8 5 3       | 881.9452                     | 1        | 5 2 3          | 6 2 4       | 882.2045                     | -3       | 17 3 15        | 16 3 14     | 885.7847                     | 7        |
| 7 5 3          | 8 5 4       | 881.9452                     | -3       | 5 1 4          | 6 1 5       | 882.2244                     | -2       | 17 2 15        | 16 2 14     | 885.7847                     | 4        |
| 7 2 6          | 8 2 7       | 881.9486                     | -9       | 5 3 2          | 6 3 3       | 882.2355                     | 5        | 18 1 18        | 17 1 17     | 885.8368                     | -3       |
| 7 6 2          | 8 6 3       | 881.9685                     | -3       | 5 3 3          | 6 3 4       | 882.2487                     | 5        | 18 0 18        | 17 0 17     | 885.8368                     | -3       |
| 7 6 1          | 8 6 2       | 881.9685                     | -3       | 5 2 4          | 6 2 5       | 882.2579                     | 1        | 18 1 17        | 17 1 16     | 885.8827                     | 2        |
| 7 7 1          | 8 7 2       | 881.9947                     | 0        | 5 4 2          | 6 4 3       | 882.2601                     | -5       | 18 2 17        | 17 2 16     | 885.8827                     | 2        |
| 7 7 0          | 8 7 1       | 881.9947                     | 0        | 5 4 1          | 6 4 2       | 882.2601                     | 4        | 18 2 16        | 17 2 15     | 885.9279                     | 10       |
| 7 0 7          | 8 0 8       | 882.0015                     | -10      | 5 5 0          | 6 5 1       | 882.2801                     | 9        | 18 3 16        | 17 3 15     | 885.9279                     | 12       |
| 7 1 7          | 8 1 8       | 882.0034                     | -9       | 5 5 1          | 6 5 2       | 882.2801                     | 9        | 17 8 10        | 16 8 9      | 885.9365                     | -8       |
| 6 2 4          | 7 2 5       | 882.0333                     | -6       | 5 0 5          | 6 0 6       | 882.2935                     | -1       | 17 8 9         | 16 8 8      | 885.9365                     | -10      |
| 6 3 3          | 7 3 4       | 882.0576                     | -2       | 5 1 5          | 6 1 6       | 882.2991                     | -4       | 19 2 18        | 18 2 17     | 886.0263                     | 5        |
| 6 1 5          | 7 1 6       | 882.0730                     | -4       | 4 2 2          | 5 2 3       | 882.3794                     | 11       | 19 1 18        | 18 1 17     | 886.0263                     | 5        |
| 6 3 4          | 7 3 5       | 882.0843                     | -1       | 4 1 3          | 5 1 4       | 882.3825                     | 11       | 20 0 20        | 19 0 19     | 886.1245                     | -3       |
| 6 4 2          | 7 4 3       | 882.0913                     | 3        | 4 3 1          | 5 3 2       | 882.4081                     | 10       | 20 1 20        | 19 1 19     | 886.1245                     | -3       |
| 6 4 3          | 7 4 4       | 882.0940                     | 2        | 4 3 2          | 5 3 3       | 882.4127                     | 4        | 20 1 19        | 19 1 18     | 886.1699                     | 10       |
| 6 2 5          | 7 2 6       | 882.1024                     | -4       | 4 2 3          | 5 2 4       | 882.4153                     | 7        | 20 2 19        | 19 2 18     | 886.1699                     | 10       |
| 6 5 2          | 7 5 3       | 882.1129                     | -2       | 4 4 1          | 5 4 2       | 882.4269                     | 9        |                |             |                              |          |

Assignments of FTIR spectra.

| $J' K'_a K'_c$ | $J K_a K_c$ | $\tilde{\nu}_0^{\text{exp}}$ | $\Delta$ | $J' K'_a K'_c$ | $J K_a K_c$ | $\tilde{\nu}_0^{\text{exp}}$ | $\Delta$ | $J' K'_a K'_c$ | $J K_a K_c$ | $\tilde{\nu}_0^{\text{exp}}$ | $\Delta$ |
|----------------|-------------|------------------------------|----------|----------------|-------------|------------------------------|----------|----------------|-------------|------------------------------|----------|
| 30 0 30        | 31 0 31     | 878.6090                     | 8        | 17 1 17        | 18 1 18     | 880.5321                     | -4       | 19 1 19        | 18 1 18     | 885.9802                     | -7       |
| 30 1 30        | 31 1 31     | 878.6090                     | 8        | 16 2 15        | 17 2 16     | 880.6108                     | 6        | 19 0 19        | 18 0 18     | 885.9802                     | -7       |
| 26 0 26        | 27 0 27     | 879.2020                     | 3        | 16 1 15        | 17 1 16     | 880.6108                     | 7        | 19 2 18        | 18 2 17     | 886.0257                     | -1       |
| 26 1 26        | 27 1 27     | 879.2020                     | 3        | 16 0 16        | 17 0 17     | 880.6800                     | 0        | 19 1 18        | 18 1 17     | 886.0257                     | -1       |
| 25 0 25        | 26 0 26     | 879.3495                     | -4       | 16 1 16        | 17 1 17     | 880.6800                     | 0        | 20 1 20        | 19 1 19     | 886.1242                     | -6       |
| 25 1 25        | 26 1 26     | 879.3495                     | -4       | 15 1 15        | 16 1 16     | 880.8283                     | 10       | 20 0 20        | 19 0 19     | 886.1242                     | -6       |
| 24 0 24        | 25 0 25     | 879.4976                     | -4       | 15 0 15        | 16 0 16     | 880.8283                     | 10       | 20 2 19        | 19 2 18     | 886.1686                     | -3       |
| 24 1 24        | 25 1 25     | 879.4976                     | -4       | 13 1 13        | 14 1 14     | 881.1207                     | -12      | 20 1 19        | 19 1 18     | 886.1686                     | -3       |
| 23 2 22        | 24 2 23     | 879.5706                     | -15      | 13 0 13        | 14 0 14     | 881.1207                     | -11      | 21 1 21        | 20 1 20     | 886.2701                     | 16       |
| 23 1 22        | 24 1 23     | 879.5706                     | -15      | 11 0 11        | 12 0 12     | 881.4150                     | -10      | 21 0 21        | 20 0 20     | 886.2701                     | 16       |
| 23 0 23        | 24 0 24     | 879.6458                     | -2       | 11 1 11        | 12 1 12     | 881.4150                     | -11      | 21 1 20        | 20 1 19     | 886.3113                     | -8       |
| 23 1 23        | 24 1 24     | 879.6458                     | -2       | 11 1 11        | 10 1 10     | 884.8257                     | -17      | 21 2 20        | 20 2 19     | 886.3113                     | -8       |
| 22 1 21        | 23 1 22     | 879.7199                     | -8       | 11 0 11        | 10 0 10     | 884.8257                     | -18      | 22 1 22        | 21 1 21     | 886.4129                     | 7        |
| 22 2 21        | 23 2 22     | 879.7199                     | -8       | 13 1 13        | 12 1 12     | 885.1145                     | -18      | 22 0 22        | 21 0 21     | 886.4129                     | 7        |
| 22 1 22        | 23 1 23     | 879.7941                     | 2        | 13 0 13        | 12 0 12     | 885.1145                     | -18      | 23 0 23        | 22 0 22     | 886.5568                     | 11       |
| 22 0 22        | 23 0 23     | 879.7941                     | 2        | 14 0 14        | 13 0 13     | 885.2592                     | -15      | 23 1 23        | 22 1 22     | 886.5568                     | 11       |
| 21 1 20        | 22 1 21     | 879.8681                     | -9       | 14 1 14        | 13 1 13     | 885.2592                     | -14      | 24 0 24        | 23 0 23     | 886.6995                     | 4        |
| 21 2 20        | 22 2 21     | 879.8681                     | -9       | 15 1 15        | 14 1 14     | 885.4038                     | -11      | 24 1 24        | 23 1 23     | 886.6995                     | 4        |
| 21 0 21        | 22 0 22     | 879.9430                     | 12       | 15 0 15        | 14 0 14     | 885.4038                     | -11      | 25 0 25        | 24 0 24     | 886.8417                     | -8       |
| 21 1 21        | 22 1 22     | 879.9430                     | 12       | 16 0 16        | 15 0 15     | 885.5483                     | -7       | 25 1 25        | 24 1 24     | 886.8417                     | -8       |
| 20 1 20        | 21 1 21     | 880.0905                     | 9        | 16 1 16        | 15 1 15     | 885.5483                     | -7       | 27 1 27        | 26 1 26     | 887.1285                     | -6       |
| 20 0 20        | 21 0 21     | 880.0905                     | 9        | 16 1 15        | 15 1 14     | 885.5953                     | -4       | 27 0 27        | 26 0 26     | 887.1285                     | -6       |
| 19 2 18        | 20 2 19     | 880.1665                     | 7        | 16 2 15        | 15 2 14     | 885.5953                     | -4       | 28 1 28        | 27 1 27     | 887.2697                     | -25      |
| 19 1 18        | 20 1 19     | 880.1665                     | 7        | 17 2 16        | 16 2 15     | 885.7392                     | 1        | 28 0 28        | 27 0 27     | 887.2697                     | -25      |
| 19 1 19        | 20 1 20     | 880.2385                     | 12       | 17 1 16        | 16 1 15     | 885.7392                     | 1        | 31 0 31        | 30 0 30     | 887.7015                     | 6        |
| 19 0 19        | 20 0 20     | 880.2385                     | 12       | 18 0 18        | 17 0 17     | 885.8372                     | 1        | 31 1 31        | 30 1 30     | 887.7015                     | 6        |
| 17 0 17        | 18 0 18     | 880.5321                     | -4       | 18 1 18        | 17 1 17     | 885.8372                     | 1        |                |             |                              |          |

 $\Delta = \text{o-c}$  (observed minus calculated) in  $10^{-4} \text{ cm}^{-1}$
